# Supplementary material for: The rising death burden of atrial fibrillation and flutter in low-income regions and younger populations
Source: Frontiers journal article supplement (doi:10.3389/fepid.2023.1122790), 2023-06-05
Supplement: Image_2.pdf [file Image_2.pdf]

Supplementary Figure 2

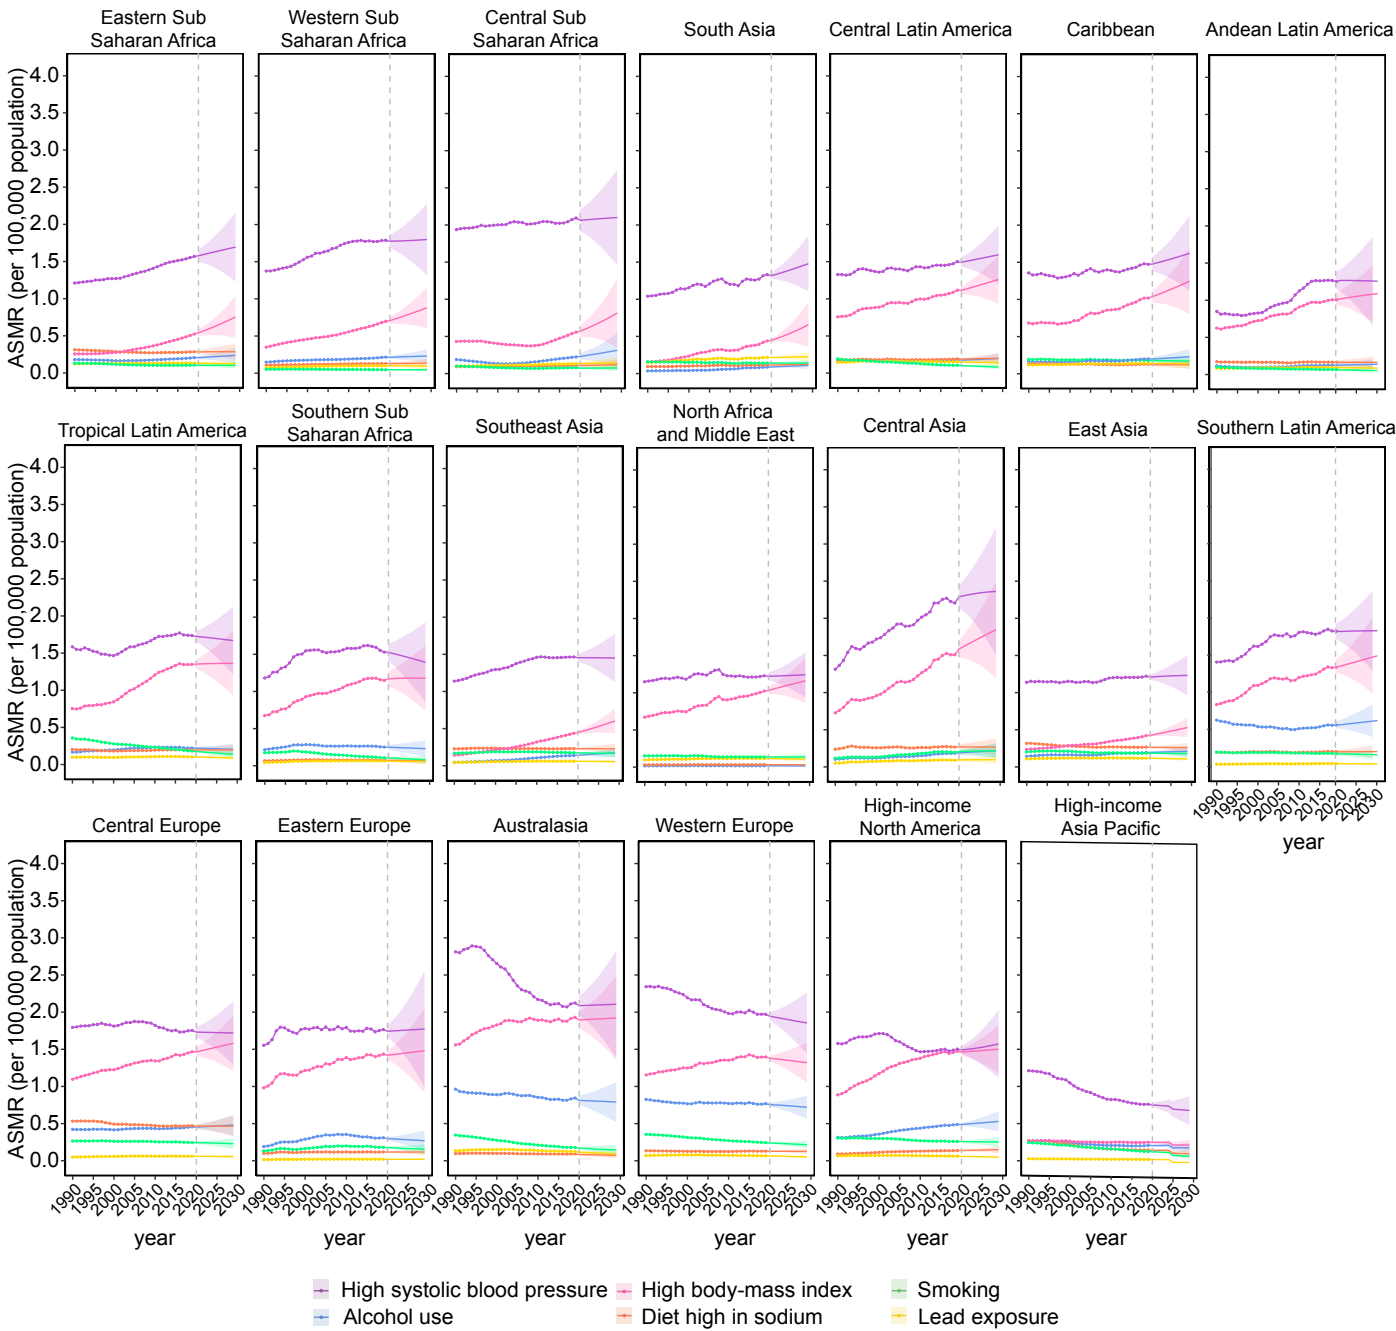

**Supplementary Figure 2.** The trends of ASMRs attributable to main risk factors in GBD regions from 1990 to 2019 and projection to 2029.
